# 1 Asymmetric representation of aversive prediction errors in Pavlovian threat conditioning

2 Karita E. Ojala<sup>1,2</sup> \* <sup>CO</sup>, Athina Tzovara<sup>1-3</sup> <sup>CO</sup>, Benedikt A. Poser<sup>4</sup>, Antoine Lutti<sup>5</sup> and Dominik R. Bach<sup>1, 2, 6</sup> \*

3

4 <sup>1</sup>Computational Psychiatry Research, Department of Psychiatry, Psychotherapy and Psychosomatics, Psychiatric  
5 Hospital, University of Zurich, Switzerland

6 <sup>2</sup> Neuroscience Centre Zurich, University of Zurich, Switzerland

7 <sup>3</sup>Institute for Computer Science, University of Bern, Switzerland

8 <sup>4</sup> Department of Cognitive Neuroscience, Faculty of Psychology and Neuroscience, Maastricht University, Maastricht,  
9 The Netherlands

10 <sup>5</sup>Laboratory for Research in Neuroimaging, Department of Clinical Neuroscience, Lausanne University Hospital and  
11 University of Lausanne, Switzerland

12 <sup>6</sup>Wellcome Centre for Human Neuroimaging and Max-Planck UCL Centre for Computational Psychiatry and Ageing  
13 Research, University College London, UK

14 \* Corresponding authors, CO = Equal contribution/co-first authors

15

16 **Author contributions:** DRB incepted the research question; AT and DRB designed the study; AT and AL  
17 collected the data; BP and AL contributed unpublished analytics; KEO and DRB analyzed the data; KEO, AT  
18 and DRB wrote the paper; DRB supervised the work at all stages. All authors contributed to the manuscript.

## 19 **Materials & Correspondence:**

20 Karita E. Ojala, Institute of Systems Neuroscience, Center for Experimental Medicine, University Medical  
21 Center Hamburg-Eppendorf, Martinistrasse 52, 22046 Hamburg, Germany, k.ojala@uke.de

22 Dominik R. Bach, Max-Planck UCL Centre for Computational Psychiatry and Ageing Research, University  
23 College London, 10-12 Russell Square, London, WC1B 5EH, United Kingdom, d.bach@ucl.ac.uk

24 **Acknowledgements and funding:** We thank Samuel Gerster for technical assistance and Bogdan Draganski  
25 for continued support. This project was supported by Olga Mayenfisch Foundation and Swiss National  
26 Science Foundation (320030\_149586 to DRB, 320030\_188737 to AT, and 320030\_184784 to AL), the  
27 Wellcome Centre for Human Neuroimaging receives core funding from the Wellcome Trust (091593/Z/10/Z).  
28 DRB is also supported by funding from the European Research Council (ERC) under the European Union's  
29 Horizon 2020 research and innovation programme (Grant agreement No. ERC-2018 CoG-816564  
30 ActionContraThreat). AT is supported by the Interfaculty Research Cooperation "Decoding Sleep: From  
31 Neurons to Health & Mind" of the University of Bern. BAP is supported by Netherlands Organization for  
32 Scientific Research (NWO) VIDI 016.178.052 and by partial funding from R01 MH111444/MH/NIMH NIH. AL  
33 is supported by the ROGER DE SPOELBERCH Foundation.

34 **Competing interests:** Authors report no conflict of interest.

35

36 **Abstract**

37 Learning to predict threat is important for survival. Such learning may be driven by differences between  
38 expected and encountered outcomes, termed prediction errors (PEs). While PEs are crucial for reward  
39 learning, the role of putative PE signals in aversive learning is less clear. Here, we used functional magnetic  
40 resonance imaging in humans to investigate neural PE signals. Four cues, each with a different probability of  
41 being followed by an aversive outcome, were presented multiple times. We found that neural activity only at  
42 omission - but not at occurrence - of predicted threat related to PEs in the medial prefrontal cortex. More  
43 expected omission was associated with higher neural activity. In no brain region did neural activity fulfill  
44 necessary computational criteria for full signed PE representation. Our result suggests that, different from  
45 reward learning, aversive learning may not be primarily driven by PE signals in one single brain region.

46

47 Key words: aversive prediction errors, threat learning, axiomatic conditions, reinforcement learning,  
48 normative Bayesian learning, fMRI

## 49 Introduction

50 Learning from aversive experiences benefits long-term survival by improving an organism's capacity to avoid  
51 threatening situations<sup>1</sup>. Reinforcement learning theory prescribes how violations of prior expectation,  
52 termed prediction errors (PE), might drive associative cue-outcome learning<sup>2</sup>. While neural PE signals in  
53 dopaminergic midbrain circuits are required for appetitive learning<sup>3-5</sup>, the same is not established for  
54 aversive learning. During Pavlovian threat conditioning, also termed fear conditioning, neurons in  
55 periaqueductal gray (PAG) and lateral amygdala (LA) progressively reduce firing to an unconditioned  
56 stimulus (US), possibly due to progressive inhibition from central amygdala<sup>6-8</sup>. This neural firing could  
57 correspond to positive PE signals, where we define "positive" as "more aversive than expected", which  
58 corresponds here to US presentation. However, it is less clear where and how negative aversive PE signals  
59 (i.e., responses to US omission) are expressed. Recent studies suggest that dopaminergic midbrain regions  
60 encode negative PE signals to US omission, and that these signals are required for extinction of threat  
61 learning<sup>9,10</sup>. However, it is as yet not known whether they are also used for initial acquisition of threat  
62 learning, and to date there is no direct evidence of negative PE signals in PAG or LA. Furthermore, it is  
63 unclear which neural populations signal positive aversive PEs once US probabilities are learned, as  
64 established for appetitive PE signals<sup>11</sup>. Finally, the pathways that convey putative PE signals from PAG to LA,  
65 and any intermediate relays, remain unknown<sup>12</sup>.

66 In a search for formal learning mechanisms, computational neuroimaging studies have committed to  
67 specific learning models and assumed a linear mapping of positive and negative PEs to neural signals. They  
68 then regressed model-derived PEs onto blood-oxygen-dependent (BOLD) signal and found correlation in  
69 striatum, a target region of reward PE-expressing midbrain neurons<sup>13-16</sup>, but also insula, periaqueductal  
70 grey, substantia nigra/ventral tegmental area, ventromedial prefrontal cortex, dorsolateral prefrontal cortex,  
71 orbitofrontal cortex, anterior cingulate cortex, middle cingulate cortex, thalamus, and amygdala<sup>13,16-21</sup>. BOLD  
72 signal in the amygdala has been found to correlate with unsigned PEs or associability in humans<sup>14,15</sup> as well  
73 as in mice<sup>22</sup>. The limitation of this correlational approach is twofold: first, its sensitivity is reduced if the a  
74 priori chosen learning model does not correspond to the true learning model. Second, significant correlation  
75 between PE and neural signal can be driven by a strong relation only on some trials and no relation on  
76 others, such that the neural signal may not comply with computational requirements of reinforcement  
77 learning.

78 To act as PE signal in any computational learning algorithm, previous work has identified three  
79 general criteria, or 'axioms', that must be fulfilled<sup>23</sup>. PE signals that adhere to these axioms have been  
80 observed in appetitive Pavlovian conditioning<sup>24,25</sup> as well in aversive instrumental conditioning, and in  
81 learning to predict pain intensities<sup>20</sup>. It remains unknown whether these criteria are also fulfilled by a single  
82 brain region in Pavlovian threat conditioning.

83 Here, we formally investigated neural PE signals to US outcomes that had previously been associated  
84 with predictive CS in an Pavlovian threat conditioning procedure. To this end, we used two distinct outcomes  
85 (US+: US delivered; US–: US omitted) and 4 conditioned stimuli (CS) with distinct rates of receiving the US+  
86 (0%, 33%, 66%, 100%). This design allowed us to analyse PE signals after US occurrence as well as omission,  
87 without commitment to any particular learning model. We also sought to explore neural activity during  
88 learning of the CS-US associations. Here, we relied on a normative Bayesian learning model, which in  
89 previous work explained threat-conditioned responses better than various non-probabilistic reinforcement  
90 learning models<sup>26,27</sup>.

91

## 92 **Results**

### 93 *Explicit CS-US contingency knowledge*

94 Participants underwent delay threat conditioning with four visual conditioned stimuli (CS), which were  
95 geometric shapes of different color, each associated with a distinct US rate (0%, 33%, 66%, or 100%).  
96 Unconditioned stimulus (US) was an aversive electric shock to the right forearm, ending concurrently with  
97 the CS (Fig. 1A). Participants reported explicit knowledge of the CS-US contingencies after the maintenance  
98 phases of the experiment (200 trials, Fig. 1B, 2A). There was a significant linear effect of CS type on  
99 contingency estimates, and pairwise differences for CS(100%) > CS(66%), CS(66%) > CS(33%), and for  
100 CS(33%) > CS(0%) (Table 2). Results were similar in a behavioral experiment outside the scanner (164 trials)  
101 (Table 2).

102

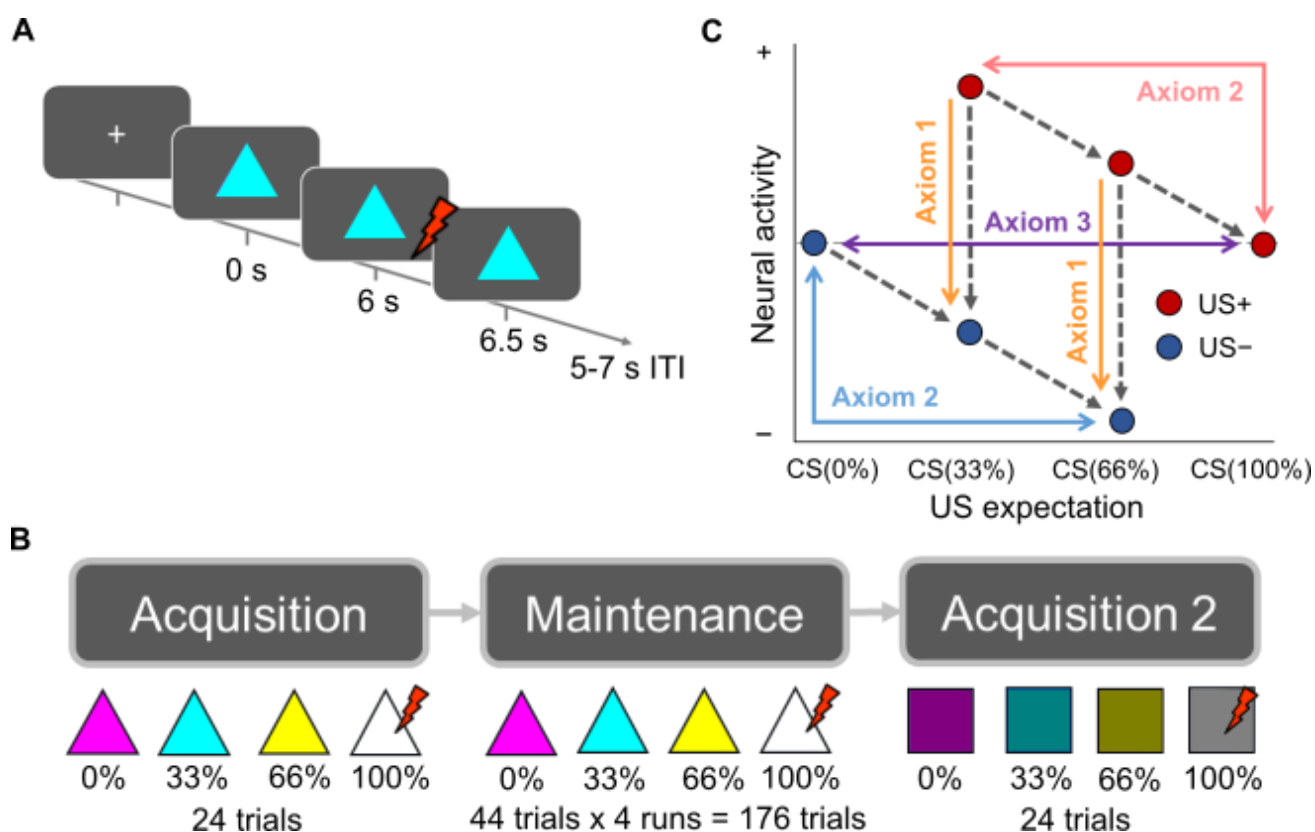

103

104 **Figure 1. A**, Experimental design. A classical delay threat conditioning paradigm was used with colored  
 105 shapes as conditioned stimuli (CSs), presented for 6.5 s. The CSs predicted an aversive electric shock (US)  
 106 with different rates (0%, 33%, 66%, 100%). If the US occurred (US+ trials), it started 6 s into CS presentation  
 107 and lasted 0.5 s, co-terminating with the CS. The inter-trial interval was 5-7 s long. **B**, Experimental phases. In  
 108 the acquisition phase, each CS (triangle) was presented 6 times in a row. In the maintenance phase, each of  
 109 these CSs was presented 44 times over four blocks. In the second acquisition phase, the task structure was  
 110 the same as in the first acquisition phase but new CS shape (rectangle) and colors were presented. **C**, The  
 111 necessary and sufficient conditions for full signed PEs. Comparisons of conditions are theoretically possible  
 112 in both directions (i.e., the positive and negative signs on the y-axis are arbitrary) but based on previous  
 113 work we a priori expected higher neural activity for higher PE (positive values after US+). Grey dashed lines  
 114 depict the tested contrasts, which were tested either all in direction of the arrows, or all into the opposite  
 115 direction. Using the a priori expected direction of comparisons, axiom 1 states that shock outcomes are  
 116 associated with higher activity than no shock outcomes. Axiom 2 states that the more unexpected the  
 117 outcome is, the higher the related BOLD activity regardless of outcome type (US+ or US-). Axiom 3 always  
 118 states that activity is the same for fully expected outcomes regardless of outcome type.

119

120

121

122 **Table 2. Explicit CS-US contingency knowledge statistics.**

| Subjective ratings for fMRI experiment ( $N = 21$ , 200 trials)                       |                 |                 |                      |                 |
|---------------------------------------------------------------------------------------|-----------------|-----------------|----------------------|-----------------|
|                                                                                       | CS(0%)          | CS(33%)         | CS(66%)              | CS(100%)        |
| Mean $\pm$ SD                                                                         | 14.8 $\pm$ 24.1 | 44.3 $\pm$ 17.7 | 55.4 $\pm$ 19.3      | 78.6 $\pm$ 31.7 |
| Repeated-measures ANOVA                                                               | $F$             | $df$            | $p$                  | $\eta^2_p$      |
| Subjective rating $\sim$ CS type                                                      | 25.99           | 3, 80           | 7.78e <sup>-12</sup> | 0.49            |
| Linear contrast                                                                       | 75.88           | 1, 80           | 3.25e <sup>-13</sup> |                 |
| Paired t-test, one-sided                                                              | $T$             | $df$            | $p$                  | $ d $           |
| CS(100%) > CS(66%)                                                                    | 4.06            | 20              | 0.0003*              | 0.44            |
| CS(66%) > CS(33%)                                                                     | 2.02            | 20              | 0.028*               | 0.22            |
| CS(33%) > CS(0%)                                                                      | 6.09            | 20              | 0.00003*             | 0.66            |
| Subjective ratings for behavioral outside-scanner experiment ( $N = 18$ , 164 trials) |                 |                 |                      |                 |
|                                                                                       | CS(0%)          | CS(33%)         | CS(66%)              | CS(100%)        |
| Mean $\pm$ SD                                                                         | 7.6 $\pm$ 13.1  | 40.7 $\pm$ 25.4 | 67.5 $\pm$ 22.5      | 85.6 $\pm$ 26.5 |
| Repeated-measures ANOVA                                                               | $F$             | $df$            | $p$                  | $\eta^2_p$      |
| Subjective rating $\sim$ CS type                                                      | 44.03           | 3, 72           | 2.84e <sup>-16</sup> | 0.65            |
| Linear contrast                                                                       | 129.07          | 1, 72           | 2.00e <sup>-16</sup> |                 |
| Paired t-test, one-sided                                                              | $T$             | $df$            | $p$                  | $ d $           |
| CS(100%) > CS(66%)                                                                    | 2.30            | 17              | 0.0167*              | 0.26            |
| CS(66%) > CS(33%)                                                                     | 4.16            | 17              | 0.0003*              | 0.48            |
| CS(33%) > CS(0%)                                                                      | 4.67            | 17              | 0.00009*             | 0.54            |

123 For paired t-tests, Holm-Bonferroni correction was applied over the three comparisons within each  
 124 experiment. \*  $p < 0.05$  with corrected  $\alpha$ -level.

125

126 *Pupil size responses*

127 To ensure implicit learning in this paradigm, we analyzed pupil data from a behavioral experiment outside  
 128 the scanner. We were interested in how US expectation, while seeing one of four CSs with different US rates,  
 129 was reflected in pupil size. Across the entire experiment, we found a significant linear effect ( $p < .05$ ) of US  
 130 expectation (Fig. 2B) with greater pupil dilation for higher US expectation between about 1-6 s after CS  
 131 onset. Post-hoc pairwise comparisons further showed that the response to CS(66%) was more pronounced  
 132 than for CS(33%) between about 0.5-6 s after CS onset, and greater for CS(33%) than for CS(0%) around 4-5 s  
 133 after CS onset, while CS(100%) and CS(66%) did not differ significantly (Fig. 2B).

134

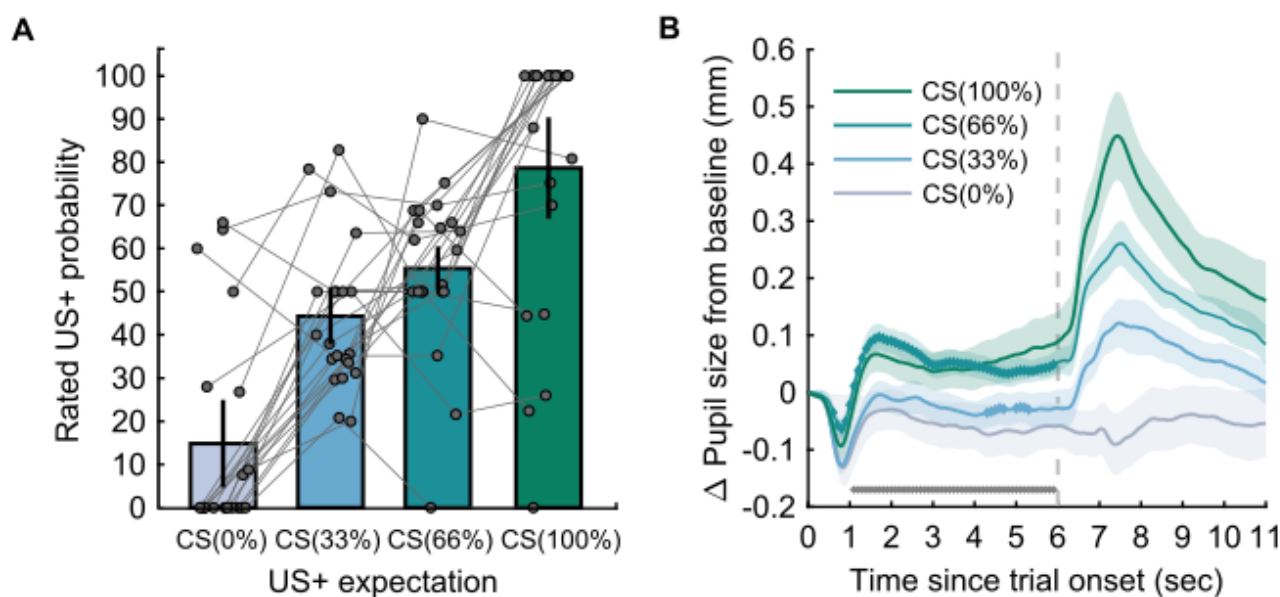

135  
136

137 **Figure 2.** US expectancy ratings and threat-conditioned pupil size responses for each CS. **A**, Explicit CS-US  
138 contingency knowledge as measured by US expectancy ratings after the maintenance phase of the  
139 experiment in the fMRI sample. The plot shows mean and standard errors of the mean as well as individual  
140 ratings (connected lines refer to individual participants). **B**, Average pupil size change from baseline in the  
141 outside-scanner sample, over trial time. Shaded areas depict the standard error of the mean. Grey horizontal  
142 markers below the time courses show the significant effect of CS type on pupil size, based on a cluster-based  
143 correction for multiple comparison across the entire CS-US interval. Markers on CS time courses show the  
144 significant clusters for the comparison of each CS type in relation to the previous one (CS(100%) > CS(66%),  
145 CS(66%) > CS(33%), CS(33%) > CS(0%)). There was one significant cluster approximately covering the CS-US  
146 interval (0-6 s) for CS(66%) > CS(33%) and two significant clusters at around 4-5 seconds after CS onset for  
147 CS(33%) > CS(0%). Location of the clusters is shown for illustration only and is not part of the statistical test.  
148

#### 149 *Neural representation of PEs: whole-brain analysis*

150 As a quality check, we observed an effect of US type (US+ > US-) on BOLD fMRI activity in the bilateral  
151 anterior and posterior insula, bilateral temporal, parietal and central operculum, right supramarginal gyrus,  
152 right superior temporal gyrus and left transverse temporal gyrus (voxel-wise FWE  $p < .05$ ).

153 In our primary analysis, we investigated fMRI data for parametric covariates of full signed PE signals,  
154 including positive (US occurrence) and negative (US omission) PEs, with a whole-brain univariate approach  
155 during the maintenance phase of the experiment. The PEs in this primary analysis were defined as the  
156 difference between the experienced outcome and the objective US rate of the CS. BOLD responses to the US  
157 were correlated with full signed PEs in bilateral superior medial prefrontal cortex and right middle-superior  
158 occipital gyrus and superior parietal lobule ( $p < .05$  cluster-level FWE, Fig. 3A, Table 2). That is, more  
159 unexpected US+ outcomes were associated with higher BOLD activity, and more unexpected US- outcomes,  
160 i.e. omission of US, were associated with lower BOLD activity in these clusters (in accordance with Fig. 1C).  
161 However, examination of BOLD amplitude estimates extracted from individual conditions in our categorical



162 GLM suggested that this effect was driven by the influence of negative PEs, whereas condition averages did  
163 not show a linear relation between US+ expectation and BOLD signals for positive PEs (Fig. 3A; Table 4).

164 Regarding BOLD responses to the CS, we found no evidence for an association with outcome expectation.

165 To allow for a possibility that the brain represents positive and negative PEs in partly different  
166 regions, we analyzed each type of PE separately in an exploratory follow-up analysis. Consistently with our  
167 examination of full signed PE representation, we found that BOLD activity in multiple clusters significantly  
168 correlated with negative PEs. More unexpected US- outcomes were associated with lower BOLD activity in  
169 clusters approximately located around bilateral superior frontal gyrus, left angular gyrus and left posterior  
170 cingulate gyrus, partly overlapping with the smaller frontal cluster of the full PE model (Fig. 3B,D). Extracted  
171 condition averages from our categorical GLM showed a linear gradient of negative PEs, as expected. On the  
172 other hand, we found no evidence of BOLD activity association with positive PEs. Furthermore, we found no  
173 evidence for a positive relation of BOLD activity with unsigned PEs (absolute values of the full signed PEs).  
174 This analysis would also have revealed areas in which the slope of a BOLD activity relation with positive PEs  
175 would be steeper (more negative) than for negative PE (see Methods). However, we found a cluster in which  
176 slope of a BOLD activity relation with negative PEs was steeper (more negative) than for positive PE, located  
177 approximately around left superior frontal and bilateral medial frontal regions (Fig. 3C), and partly  
178 overlapping with the ventromedial part of the negative PE frontal cluster but not with the dorsomedial full  
179 signed PE cluster (Fig. 3C,D, Table 4). An alternative interpretation for this cluster is a negative correlation  
180 between unsigned PEs and BOLD activity in this region. Investigation of the extracted parameter estimates  
181 from the categorical GLM was in favor of the former interpretation: the slope of BOLD activity relation with  
182 PEs was flat rather than positive, as would be expected for an unsigned PE representation.

183 In these PE models, we used the overall US rate to compute PEs, but participants would not have  
184 perfectly learned these at the start of the maintenance phase. To ensure this did not obscure representation  
185 of PEs, we investigated a full signed PE model based on prior mean (US expectation) from a normative  
186 Bayesian learning model, which has been previously shown to reflect aversive learning in humans<sup>27</sup>. We  
187 found very similar results to the full signed PE model, that is, larger PEs were associated with increased BOLD  
188 activity in a cluster approximately located around left medial superior frontal gyrus (peak voxel coordinates  
189 -6, 60, 25; peak  $T = 4.90$ , cluster-level FWE-corrected  $p = 0.014$ , cluster size 366 voxels; Supplementary  
190 Figure S1, Supplementary Table S1).

191

### 192 *Neural representation of PEs: region-of-interest analysis*

193 Whole-brain search may provide limited statistical power if full signed PE representations occurred in small  
194 regions. Hence, we investigated PE representations in a priori defined anatomical regions of interest. We  
195 used a formal Bayesian model selection approach to avoid multiple null hypothesis tests. Distinct from some



196 of our previous analysis, this approach seeks to simultaneously explain responses to US occurrence and US  
 197 omission. Our analysis revealed that the symmetric full PE model was the best model ( $\log BF > 3$ ) for BA 9  
 198 and ACC. The outcome-only (US+ vs. US-) model best explained the data ( $\log BF > 3$ ) for BA 44, BA 47,  
 199 anterior insula and posterior insula (Fig. 4). There was no decisive evidence in any of the other regions.

200 We applied the same analysis to the significant clusters from our whole-brain analysis, to facilitate  
 201 interpretation (Supplementary Figure S2). The full signed PE cluster in superior frontal gyrus was best  
 202 explained by a model including negative PE only (i.e., no expression of positive PE), and the full signed PE  
 203 cluster in occipital and parietal areas was best explained by an asymmetric full PE model, which implies an  
 204 encoding of positive PE but with different slope than negative PEs. Both unsigned PE clusters were best  
 205 explained by a negative PE model which implies no expression of positive PE in these areas and speaks  
 206 against any interpretation involving unsigned PE.

207  
 208 **Table 3. PE related BOLD activity during maintenance of threat associations.**

| Regressor      | Cluster anatomical region                                                             | Cluster size | Peak MNI coordinates |     |     | Peak $T$ | Cluster $p$          |
|----------------|---------------------------------------------------------------------------------------|--------------|----------------------|-----|-----|----------|----------------------|
|                |                                                                                       |              | $x$                  | $y$ | $z$ |          |                      |
| Full signed PE | 1. Superior frontal gyrus medial L,<br>Superior frontal gyrus R                       | 356          | -6                   | 60  | 24  | 4.99     | 0.014                |
|                | 2. Middle & superior occipital gyrus R,<br>Superior parietal lobule R                 | 266          | 36                   | -76 | 44  | 4.50     | 0.044                |
| Positive PE    | No significant cluster                                                                | -            | -                    | -   | -   | -        | -                    |
| Negative PE    | 1. Superior frontal gyrus L, R                                                        | 3,001        | -2                   | 60  | 24  | 7.68     | 4.23 <sup>-11</sup>  |
|                | 2. Angular gyrus L                                                                    | 418          | -58                  | -60 | 32  | 5.69     | 0.008                |
|                | 3. Posterior cingulate gyrus L                                                        | 350          | -8                   | -46 | 28  | 4.47     | 0.016                |
| Unsigned PE *  | 1. Superior frontal gyrus L                                                           | 404          | -22                  | 52  | 32  | 7.09     | 0.007                |
|                | 2. Subcallosal area L,<br>Superior frontal gyrus medial L,<br>Medial frontal cortex R | 1,636        | -2                   | 14  | -10 | 5.75     | 1.19e <sup>-07</sup> |

209 MNI, Montreal Neurological Institute. Statistical parametric maps were cluster-corrected at FWE  $p < 0.05$ ,  
 210 with initial threshold of  $p < 0.001$  uncorrected.  $T$ : t-statistic ( $df = 20$ ). Cluster  $p$ : corrected p-value. For full  
 211 signed and positive PE models, the reported contrasts reflect higher BOLD activity related to larger PE  
 212 (positive for US+, and larger for less expected US+) and lower BOLD activity for larger negative or unsigned  
 213 PE, which also reflects an interaction between positive and negative PEs (see Fig. 1C). \* The hypothesized  
 214 contrast was for higher BOLD activity for larger unsigned PE, but here we report the exploratory finding in  
 215 the opposite direction that yielded significant results. Opposite directions were tested for the other models  
 216 too but there were no further significant findings. Anatomical labels (Neuromorphometrics, SPM12) are  
 217 reported for the top 3 peak voxels within the cluster for approximate localization.

218

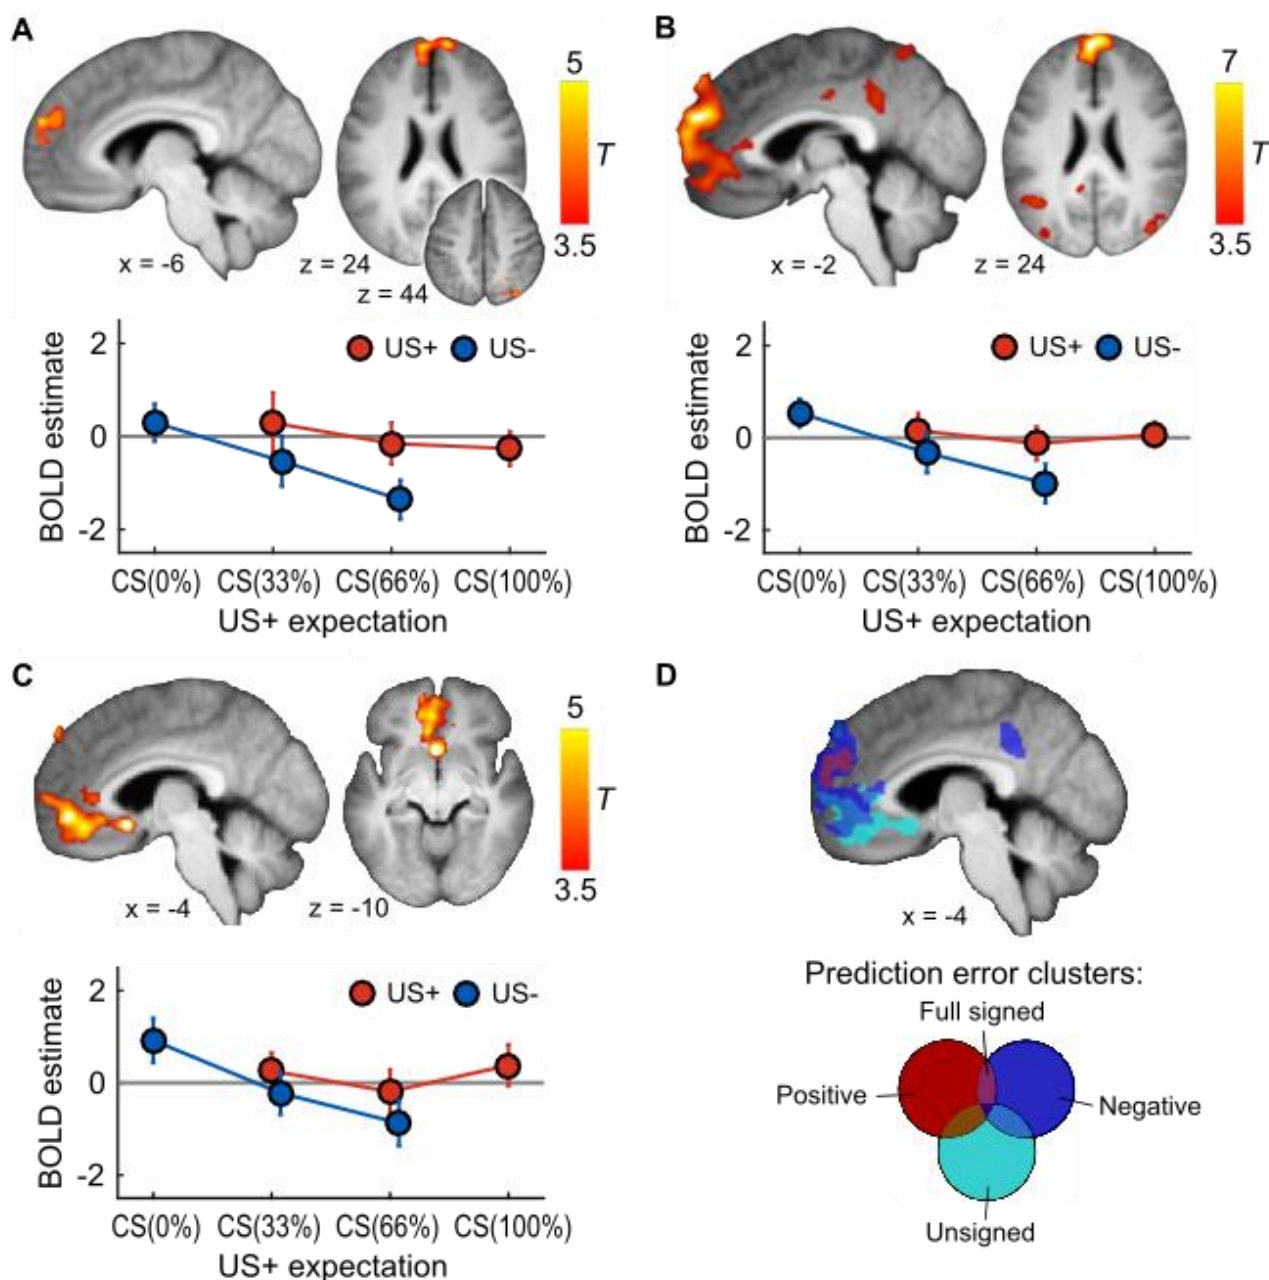

219

220

221

222

223

224

225

226

227

228

229

230

231

**Figure 3.** PE fMRI results. **A**, Full signed PEs correlated with BOLD activity in the dorsomedial prefrontal cortex (dmPFC) and superior parieto-occipital cortex. Average BOLD responses for each condition from the frontal cluster show a clear linear relationship with US expectation only for US- conditions. **B**, Negative PEs correlated with BOLD activity in the dmPFC and ventromedial PFC (vmPFC), angular gyrus and posterior cingulate cortex (PCC). **C**, Interaction of PE with outcome type in BOLD activity in vmPFC and rostral anterior cingulate cortex (rACC), indicating a representation of less expected outcomes in lower BOLD signal, or steeper (negative) BOLD relation for negative than positive PE. Statistical parametric maps were thresholded at  $p < 0.05$  cluster-level FWE with initial threshold  $p < 0.001$ . Unthresholded SPMs are available online. BOLD estimates are shown for the cluster with the lowest corrected p-value for each PE model. **D**, Significant PE clusters and their overlap. The negative PE PFC cluster almost entirely overlaps with or encompasses the PFC signed PE cluster, whereas the PE interaction cluster extends also beyond the negative PE cluster. **A-C**, BOLD amplitude estimates are shown as mean and standard error of the mean.

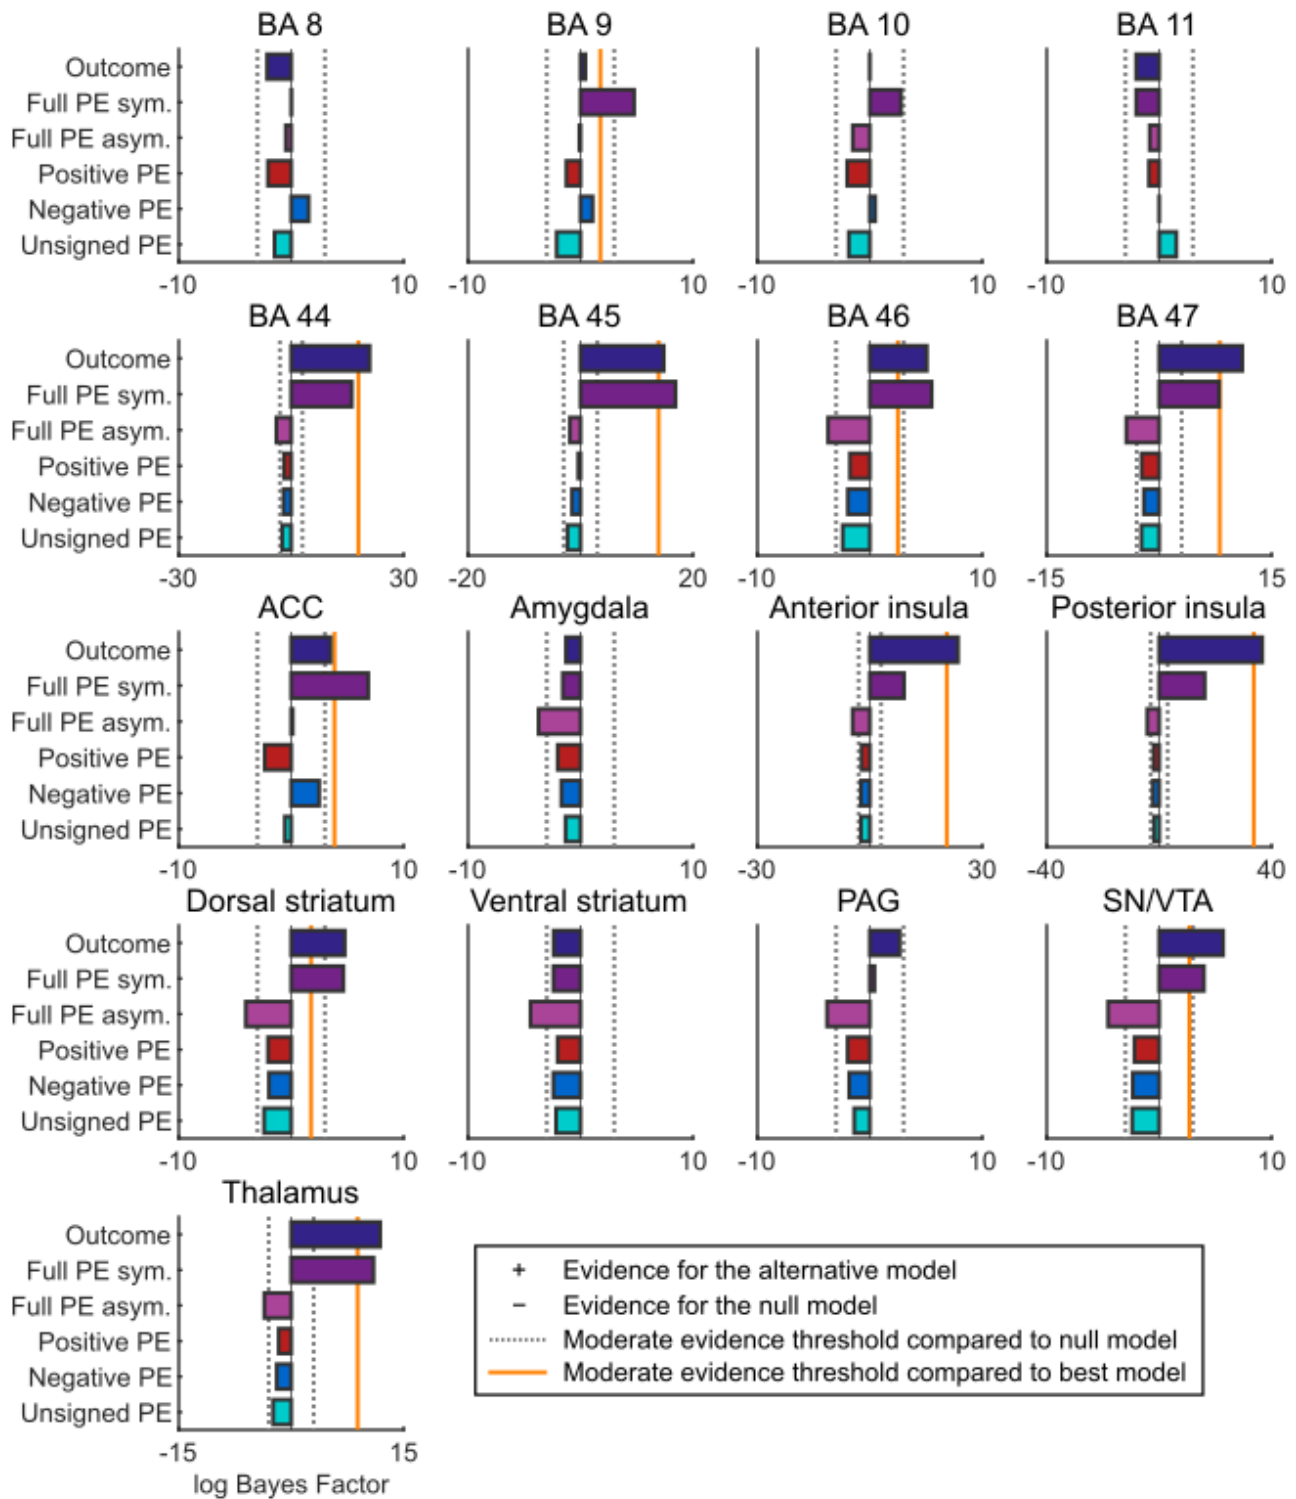

232

233

234

235

236

237

238

239

240

**Figure 4.** Model comparison of PE and outcome-only models for BOLD signals from each anatomical region-of-interest. Log Bayes Factors (BF) > 3 (dotted grey line) indicate moderate support for a model over the null model, whereas log BF < -3 denote moderate evidence for the null model, with values in between representing inconclusive evidence for any model. The orange line marks the evidence threshold (log BF 3) for moderate difference between the best model and other models. Full PE sym. = one intercept and slope parameter for both positive and negative PE; Full PE asym. = separate intercepts and slopes for positive and negative PE.

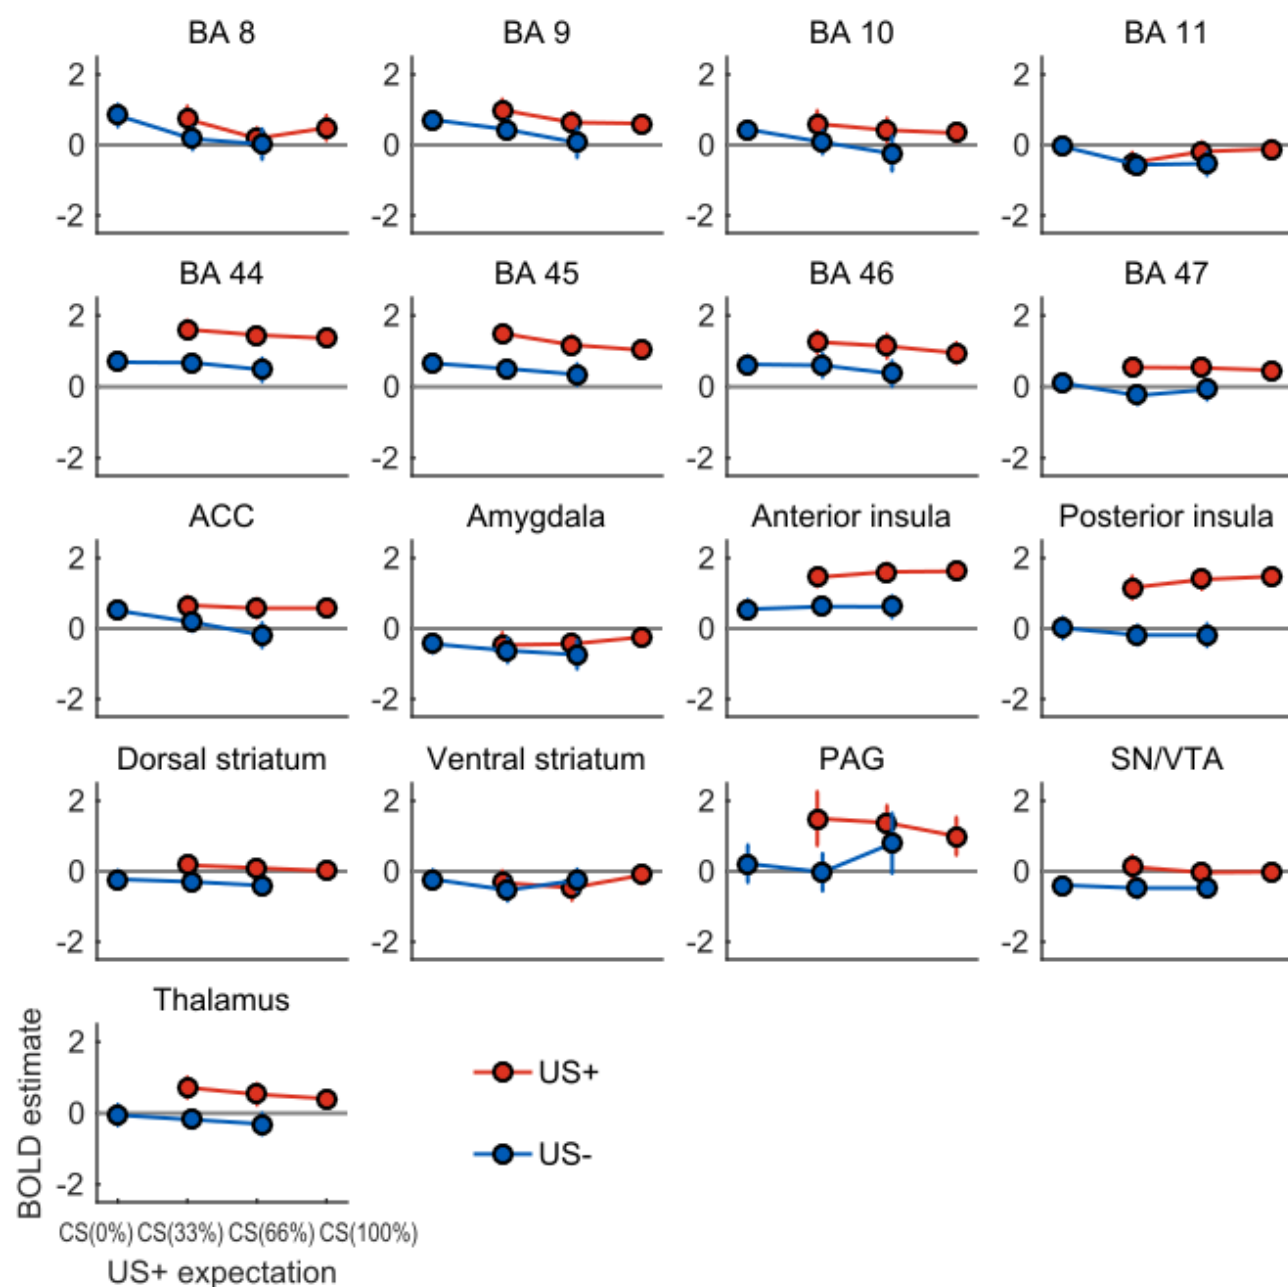

241

242 **Figure 5.** Average BOLD amplitude estimates during maintenance for each experimental condition extracted  
 243 from the anatomical ROIs. Left and right hemispheres are combined. BA = Brodmann Area. ACC = Anterior  
 244 Cingulate Cortex. PAG = Periaqueductal Grey. SN = Substantia Nigra. VTA = Ventral Tegmental Area. Error  
 245 bars are within-subject standard errors of the mean. See Table 4 for effect sizes of the axiomatic  
 246 comparisons for these ROIs.

247 **Table 4. Axiomatic comparisons for anatomical regions-of-interest and significant functional clusters**  
 248 **during maintenance of threat associations.**

| ROI                   | Axiom 1   |          | Axiom 2              |                       |                     |                      | Axiom 3              |
|-----------------------|-----------|----------|----------------------|-----------------------|---------------------|----------------------|----------------------|
|                       | US+ > US- |          | US+                  | US-                   |                     | US+ > US-            |                      |
|                       | CS(33%)   | CS(66%)  | CS(33%) ><br>CS(66%) | CS(66%) ><br>CS(100%) | CS(0%) ><br>CS(33%) | CS(33%) ><br>CS(66%) | CS(100%) ><br>CS(0%) |
|                       | <i>d</i>  | <i>d</i> | <i>d</i>             | <i>d</i>              | <i>d</i>            | <i>d</i>             | <i>d</i>             |
| BA 8                  | 0.45      | 0.12     | 0.46                 | -0.28                 | 0.64                | 0.10                 | -0.26                |
| BA 9                  | 0.58      | 0.43     | 0.34                 | 0.03                  | 0.37                | 0.24                 | -0.13                |
| BA 10                 | 0.39      | 0.38     | 0.15                 | 0.07                  | 0.35                | 0.18                 | -0.11                |
| BA 11                 | 0.05      | 0.25     | -0.32                | -0.09                 | 0.62                | -0.03                | -0.09                |
| BA 44                 | 1.07      | 0.95     | 0.17                 | 0.14                  | 0.02                | 0.18                 | 0.98                 |
| BA 45                 | 1.20      | 0.82     | 0.31                 | 0.17                  | 0.22                | 0.14                 | 0.68                 |
| BA 46                 | 0.55      | 0.54     | 0.09                 | 0.17                  | 0.03                | 0.16                 | 0.36                 |
| BA 47                 | 0.83      | 0.77     | 0.02                 | 0.10                  | 0.42                | -0.15                | 0.54                 |
| ACC                   | 0.50      | 0.63     | 0.11                 | -0.01                 | 0.44                | 0.31                 | 0.09                 |
| Amygdala              | 0.10      | 0.22     | -0.03                | -0.21                 | 0.16                | 0.09                 | 0.25                 |
| Anterior insula       | 0.91      | 1.06     | -0.16                | -0.02                 | -0.11               | 0.01                 | 1.17                 |
| Posterior insula      | 1.15      | 1.36     | -0.22                | -0.12                 | 0.22                | 0.002                | 1.41                 |
| Dorsal striatum       | 0.60      | 0.61     | 0.11                 | 0.12                  | 0.08                | 0.11                 | 0.29                 |
| Ventral striatum      | 0.16      | 0.17     | 0.11                 | -0.31                 | 0.29                | -0.24                | 0.13                 |
| PAG                   | 0.54      | 0.22     | 0.05                 | 0.23                  | 0.12                | -0.31                | 0.55                 |
| SN/VTA                | 0.48      | 0.48     | 0.17                 | -0.02                 | 0.14                | -0.004               | 0.42                 |
| Thalamus              | 0.88      | 0.75     | 0.18                 | 0.18                  | 0.15                | 0.12                 | 0.43                 |
| Full PE cluster 1     | 0.38      | 0.75     | 0.21                 | 0.08                  | 0.47                | 0.39                 | -0.40                |
| Full PE cluster 2     | 0.53      | 0.20     | 0.41                 | 0.33                  | 0.65                | 0.12                 | -0.39                |
| Negative PE cluster 1 | 0.30      | 0.56     | 0.21                 | 0.18                  | 0.61                | 0.36                 | -0.77                |
| Negative PE cluster 2 | 0.60      | 0.20     | 0.41                 | 0.04                  | 0.89                | -0.23                | -0.37                |
| Negative PE cluster 3 | 0.54      | 0.45     | 0.44                 | -0.11                 | 0.88                | 0.23                 | -0.49                |
| Unsigned PE cluster 1 | 0.29      | 0.36     | 0.25                 | -0.37                 | 0.64                | 0.35                 | -0.32                |
| Unsigned PE cluster 2 | -0.12     | 0.24     | -0.26                | -0.28                 | 0.65                | 0.19                 | -0.28                |

249 *d* = Cohen's *d* effect sizes for paired observations. As a common approximate guideline, effects of  $|d| < 0.2$   
 250 are considered small or negligent,  $d \approx 0.5$  medium, and  $d > 0.8$  large. Axioms 1 and 2 are supported if *d* is  
 251 large and positive, and axiom 3 is supported if  $|d|$  is small.

252 *Necessary and sufficient conditions for full signed PE model*

253 We next evaluated whether BOLD responses in any brain region fulfill three criteria, or ‘axioms’ (Fig. 1C), to  
254 represent PE signals in a learning-theoretic sense. In a whole-brain analysis, there were no significant  
255 clusters fulfilling the conjunction of axioms 1 (i.e., higher activity for US+ than US- outcome) and 2 (i.e.,  
256 higher activity for more unexpected US+ outcomes and for more expected US- outcomes). Axiom 1 was  
257 fulfilled in four large clusters approximately in the left central operculum/posterior insula, right parietal  
258 operculum/superior frontal gyrus, and bilateral middle cingulate gyrus/left superior frontal gyrus, and right  
259 cuneus (Table 3). However, axiom 2 was not fulfilled in any region at the whole-brain level.

260 For region-of-interest analysis, we extracted effect sizes for each axiomatic comparison. We focus  
261 here on reporting the results on regions that showed significance or decisive model evidence in favor of full  
262 signed prediction errors in our previous analyses, but full results are found in Table 4. In the first significant  
263 full signed PE cluster from our whole-brain search, as well as in anatomical BA 9 and in anatomical ACC,  
264 there was at best a very small difference between CS(66%) and CS(100%) when US occurred (both regions  
265 Cohen’s  $d \leq 0.08$ ); thus axiom 2 was clearly not fulfilled in these regions. The first full signed PE cluster also  
266 did not fulfill axiom 3 (equivalence of fully expected outcomes, Fig. 1C;  $d = -0.40$ ). The second significant full  
267 signed PE cluster from our whole-brain search only showed a very small difference between CS(66%) and  
268 CS(33%) at US omission ( $d = 0.12$ ), and did not fulfill axiom 3 ( $d = -0.39$ ). Overall, as Table 4 shows, no region  
269 had at least small-to-medium effect sizes ( $d > 0.20$ ) for all tests for axioms 1 and 2.

270

271 *Bayesian expectation uncertainty, surprise and model update*

272 In an exploratory analysis, we investigated whether any brain regions encoded quantities from a normative  
273 Bayesian learning model during two acquisition phases (first and last 24 trials). In the above PE analyses, we  
274 only included the maintenance phase where participants had already been exposed to 24 CS-US pairings.  
275 However, we were also interested in looking at initial threat learning, which is more commonly investigated  
276 in both animal and human Pavlovian threat conditioning experiments and was previously shown to be better  
277 explained by the normative Bayesian model rather than non-probabilistic reinforcement learning<sup>27</sup>. We  
278 found that expectation uncertainty positively correlated with activity in 6 large clusters across the brain;  
279 decreasing uncertainty over experienced CS-US pairings was associated with lower BOLD activity (e.g.,  
280 cluster 1: bilateral thalamus, VTA/SN;  $T(21) = 10.24$ ,  $p = 0.000014$ , 1012 voxels; Fig. S3; see Supplementary  
281 Table S2 for full results). Moreover, higher surprise to an experienced US outcome was associated with lower  
282 BOLD responses to the CS on the next trial in the left postcentral and precentral gyri ( $T(21) = 4.88$ ,  $p = 0.027$ ,  
283 244 voxels; see Table S2). Next to the two acquisition phases, we also looked at Bayesian learning during the  
284 maintenance of threat associations, where surprise was positively associated with BOLD activity in the left  
285 superior frontal gyrus ( $T(21) = 5.76$ ,  $p = 0.003$ , 390 voxels; Table S2). Furthermore, larger model update (KL



286 divergence) from the preceding trial correlated with lower BOLD activity in bilateral medial precentral gyrus,  
287 bilateral postcentral gyrus, bilateral anterior insula, left posterior insula, right parietal operculum, left middle  
288 cingulate cortex and right fusiform gyrus (e.g., cluster 1 in left anterior insula, caudate and putamen:  $T(21) =$   
289  $7.89$ ,  $p = 0.00001$ , 747 voxels; see Table S2 for full results). This activity was mostly driven by activity in the  
290 first rather than the second acquisition phase. Finally, larger model update based on the experienced  
291 outcome on the current trial was associated with higher BOLD responses after the US in the left middle  
292 occipital gyrus ( $T(21) = 6.75$ ,  $p = 0.032$ , 297 voxels; Table S2).

293

## 294 Discussion

295 Survival in biological environments requires learning associations between predictive cues and potential  
296 threatening outcomes. It has been suggested that such aversive learning is driven by prediction error (PE)  
297 signals, similarly to reward learning<sup>28</sup>. Here, we used human BOLD fMRI to investigate neural representation  
298 of PEs after Pavlovian threat conditioning and under continuing reinforcement. We found no systematic  
299 evidence for symmetric neural PE signals. Instead, we discovered regions that express PE signals only when  
300 US was omitted and not when US occurred. Such asymmetric PE representation cannot on their own be used  
301 to learn unbiased estimates of US<sup>29</sup>.

302 Our primary analysis revealed that BOLD activity in dorsomedial PFC and posterior parietal cortex  
303 correlated with signed PE. However, our secondary analyses provided several arguments why these BOLD  
304 signals are unlikely to represent full signed PEs. First, average BOLD estimates from significant PE clusters did  
305 not fulfill all of the axiomatic criteria for PE representation<sup>20,23,24</sup>. Specifically, although participants could  
306 learn the US probabilities, the extracted BOLD signals did not show large differences across levels of US  
307 expectation after US occurrence for both US occurrence and US omission (axiom 2). In a supplementary  
308 Bayesian model comparison (Fig. S1), these BOLD signals were better or equally well explained by models  
309 that separated BOLD responses for unexpected US omission (negative PE) and US occurrence (positive PE).  
310 Second, a whole-brain search for negative PEs revealed significant BOLD activity in the dorsomedial and  
311 ventromedial PFC as well as rostral ACC that entirely encompassed, as well as extended beyond, the  
312 prefrontal full signed PE-encoding cluster. Meanwhile, no significant BOLD activity was associated with  
313 positive PEs only, over and above a constant representation of the US. Third, in a cluster in the vmPFC and  
314 rostral ACC, the encoding of positive and negative PEs was significantly different. This cluster expressed  
315 negative PEs more strongly than positive PEs.

316 Next, we explored whether any a priori anatomical regions of interest expressed PE signals. Formal  
317 model comparison revealed decisive evidence that averaged BOLD signals in BA 9 and ACC were better  
318 explained by full signed PE-encoding than alternative models, including some asymmetric models. In other  
319 areas, including PAG, Bayesian model comparison either supported outcome-encoding only, or the evidence



320 was inconclusive or weak. Despite the full signed PE model winning the model comparison for two regions,  
321 there was no conclusive evidence that extracted BOLD signals from these or any other region fulfilled all of  
322 the axiomatic criteria for full signed PE-encoding.

323 Notably, some formal reinforcement learning models build on unsigned (absolute) rather than  
324 signed PEs<sup>14,30</sup>. In our design, testing for the negative association of unsigned PEs to BOLD signal was  
325 formally equivalent to testing the slope difference between positive and negative PEs. Data from the  
326 significant prefrontal cluster in this analysis, which partly overlapped with the negative PE cluster, was best  
327 explained by expression of negative but not positive PEs, rather than unsigned PE. Also, we did not observe  
328 unsigned PE signals with increased BOLD signal for any unexpected outcome.

329 During learning, we found that BOLD activity in a wide network of brain regions correlated with US  
330 expectation uncertainty. Uncertainty decreases over trials, but the representation of uncertainty found here  
331 cannot be explained by a general decrease in BOLD signal over time due to non-cognitive phenomena, as  
332 each cue in the initial learning phase was presented six times in a row. Nevertheless, a decrease in BOLD  
333 activity might also reflect factors such as attention or stimulus novelty. We also found that BOLD signals in  
334 various brain regions during CS presentation were negatively correlated with surprise and model update  
335 based on the US outcome for the previous CS of the same type. These exploratory findings might give clues  
336 for future investigations into normative models of probabilistic threat learning.

337 Using different designs, previous human neuroimaging studies have reported both positive and  
338 negative PEs in aversive learning to be represented in the same or in different brain regions<sup>17,19,20,31</sup>.  
339 Specifically, Roy et al. (2014) found that BOLD activity in PAG fulfilled all of the axiomatic criteria for full  
340 signed PE signals during instrumental and pain intensity conditioning. They also found that US expectation,  
341 but not axiomatic PE, was represented in the vmPFC, and positive PEs in the dmPFC. While instrumental and  
342 Pavlovian conditioning may engage distinct learning algorithms<sup>32</sup>, there are also important differences  
343 between the Pavlovian conditioning experiments by Roy et al. (2014), and our study. Specifically, these  
344 authors used cues predicting different heat pain intensity, rather than different probability of presenting the  
345 same stimulus as in the present study; they did not include fully predicted outcomes, and to derive PE they  
346 fitted a temporal difference learning model to participants' choices, which commits a priori to a specific  
347 learning model.

348 What could underlie the differential expression of positive and negative PE in our study? A first  
349 possible reason is to be found in biophysical relations. Negative PEs in our study correspond to better-than-  
350 expected outcomes. We note that many dopaminergic midbrain neurons encode better-than-expected  
351 outcomes in increased firing rates, and worse-than-expected outcomes in reduced firing rates, and this  
352 reduction is often less pronounced than the increase<sup>33</sup>, despite variability between individual neurons<sup>29</sup>.  
353 Assuming an asymmetry in neural firing changes, and a constant noise level in the fMRI measurement, it

354 might be more difficult to detect the smaller firing reduction than the larger firing increase. However,  
355 different from reward learning, there is currently no electrophysiological or voltammetric evidence for  
356 differential encoding of aversive PE in firing rates of the same neurons: those populations that respond to US  
357 occurrence have not been shown to be responsive to US omission <sup>7,34</sup>.

358 As a second possible reason, biased PE encoding in individual neurons can, when integrated on the  
359 population level, afford probabilistic learning <sup>29</sup>. This study addressed variability of reward PE encoding bias  
360 in neurons within one region, but the same mechanism could also act across regions. The potential  
361 asymmetry in electrophysiological PE signatures in PAG <sup>12,34</sup> with expression of positive but not negative PEs  
362 could be the flipside of negative but not positive PE signals in our study, and integration over two such  
363 biased regions could enable a reinforcement learning algorithms to achieve an unbiased estimate of US  
364 probability. We note that our fMRI sequence was not specifically optimized for PAG coverage, which might  
365 explain why we did not pick up positive PE representation here. Recent rodent studies have also shown that  
366 dopaminergic VTA neurons encode negative PE signals that are important for threat extinction <sup>9,10</sup>, further  
367 suggesting divergent positive and negative PE neural signaling in the aversive domain.

368 As a final reason, some learning algorithms use teaching signals that are distinct from PE signals. For  
369 example, the normative Bayesian learner exploited in this and previous work <sup>27</sup> requires only a categorical  
370 representation of the US to update its predictions. This raises the question whether the negative PE-  
371 encoding regions identified here are truly part of a learning system, or whether they encode an output signal  
372 that drives behavior after US omission. For example, mPFC has an important role in fear and extinction  
373 memory consolidation <sup>35</sup> and in signaling safety to the amygdala to diminish fear responses <sup>36</sup>. The negative  
374 PE signals in the vmPFC in our study could reflect phasic safety signals in response to upward changes in  
375 environmental circumstances, consistent with previous studies <sup>37,38</sup>.

376 As a general limitation of the mass-univariate fMRI approach used here and in previous work, it is  
377 possible that PEs are represented by neural populations that are sparse <sup>39</sup>, or that differ in sign and have an  
378 interleaved spatial organization, as has for example been shown for reward value representation in  
379 orbitofrontal cortex <sup>40</sup>, CS+ representations in amygdala <sup>41,42</sup>, or biased PE signals in dopaminergic midbrain  
380 <sup>29</sup>. Multivariate analysis of high-resolution fMRI might be more appropriate to delineate such  
381 representations <sup>43-45</sup>.

382 To conclude, we found no evidence of full signed PE signals in any brain region but show that BOLD  
383 signals in a ventromedial prefrontal region may encode only negative and not positive PE. We speculate this  
384 may be due to biophysical asymmetries, integration of biased PE signals across regions, or learning  
385 algorithms that do not require PE signaling.

386

## 387 **Methods**

### 388 *Participants*

389 Twenty-one participants (6 women and 15 men; mean age  $\pm$  SD: 25.5 $\pm$ 4.2) were recruited from the general  
390 and student population for the fMRI experiment and 19 participants (14 women, 5 men, mean age 24.7 $\pm$ 3.7  
391 years) for the behavioral experiment. One participant in the behavioral experiment was excluded due to  
392 pupil data quality (see details below). Participants reported that they had no history of neurological and  
393 psychiatric illnesses and gave written informed consent. The study protocol, including the form of taking  
394 consent, was in accordance with the Declaration of Helsinki and approved by the governmental research  
395 ethics committee (Kantonale Ethikkommission Zürich, 2016-00097).

396

### 397 *Procedure/experimental paradigm*

398 The assignment of CS color to US rate was randomly determined for each participant. US started 6 seconds  
399 after CS onset, lasted 0.5 seconds, and co-terminated with the CS. The intertrial interval was randomly  
400 drawn from {5 s, 6 s, 6 s, 7 s}, i.e., 6 s was twice as likely as the other values. During CS presentation,  
401 participants were instructed to indicate CS color with a key press, in order to maintain attention during the  
402 task. Before the experiment started, participants trained the CS color-key press mapping (for fMRI: inside the  
403 scanner) until 80% accuracy over at least two presentations of each CS was reached. Participants were  
404 explicitly informed that after training, all CS may be followed by US but received no information about CS-US  
405 contingencies. To exclude potential confounds for fMRI analysis, there was no evidence that reaction times  
406 and accuracy depended on CS condition (see Table 1).

407

408 **Table 1. Reaction time and accuracy statistics for the fMRI experiment.**

|                                     | CS(0%)         | CS(33%)        | CS(66%)        | CS(100%)       |
|-------------------------------------|----------------|----------------|----------------|----------------|
| Reaction time (Mean $\pm$ SD), ms   | 1046 $\pm$ 212 | 1044 $\pm$ 268 | 1086 $\pm$ 269 | 1011 $\pm$ 248 |
| Accuracy (Mean $\pm$ SD), % correct | 99.2 $\pm$ 2.7 | 99.2 $\pm$ 2.1 | 98.9 $\pm$ 2.4 | 99.2 $\pm$ 2.8 |
| One-way repeated-measures ANOVA     | <i>F</i>       | <i>df</i>      | <i>p</i>       |                |
| Reaction time ~ CS type             | 0.081          | 3, 76          | 0.97           |                |
| Accuracy ~ CS type                  | 0.142          | 3, 76          | 0.935          |                |

409 Reaction time and accuracy data from trials with reaction times shorter than 200 ms (0.2% of all trials over  
410 all participants) were excluded. Trials with incorrect or missed responses were excluded from reaction time  
411 analyses. Repeated-measures ANOVA was conducted with the 'aov' function in R.

412

413 During the first acquisition phase, participants were presented with 4 blocks of 6 consecutive trials  
414 of the same CS, in order to facilitate learning of the CS-US contingencies (24 trials in total). CS were triangles  
415 with different colors (RGB: 255, 0, 255; 0, 255, 255; 255, 255, 0; 255 255 255). Reinforcement was balanced

416 over these 6 trials per CS such that the rate of reinforcement exactly matched the overall rate. Order of the  
417 blocks was randomly determined for each participant. In the following maintenance phase, participants were  
418 presented 176 trials (44 trials per CS) of the same CSs, now in pseudo-random order, reinforced randomly at  
419 constant rate per CS and divided into four blocks. The third phase served to increase power for analysis of  
420 the acquisition process. This phase had the same structure as the first, but new CS shape (rectangles) and  
421 colors (RGB: 128, 0, 128; 0, 128, 128; 128, 128, 0; 128, 128, 128). Therefore, new CS-US associations had to  
422 be learned, with the same US rates. The experiment was presented using Cogent 2000 (version 1.32,  
423 vislab.ucl.ac.uk) on Matlab. The visual presentation was projected onto a 42 cm x 33 cm size screen (1024 x  
424 768 pixel resolution) at approximately 73 cm distance from the participants' eyes.

425

#### 426 *Delivery of the unconditioned stimuli*

427 US was delivered with a constant current stimulator (Digitimer DS7A, Digitimer, Welwyn Garden City, UK)  
428 through a pin-cathode/ring-anode configuration on the right forearm. US intensity was individually  
429 calibrated for each participant (fMRI: outside the scanner) before the experiment. First, a clearly unpleasant  
430 intensity was determined with an ascending staircase procedure. After that, participants gave subjective  
431 ratings (0 = felt nothing to 100 = very unpleasant) for 14 random intensities below the initial threshold. The  
432 intensity corresponding to a rating of 85 was chosen as the US intensity for the experiment ( $3.3 \pm 0.8$  mA,  
433 range 1.5–5.5).

434

#### 435 *Subjective recollection of US probability*

436 Participants rated their explicit knowledge of the CS-US contingencies once after the maintenance phase for  
437 the first set of CS, and once after the second acquisition phase for the second set of CS, using a  
438 computerized visual analogue scale anchored with "0%" and "100%". The initial position of the slider was set  
439 to the middle of the scale. Contingency ratings were analyzed with a one-way repeated-measures ANOVA  
440 with the 'aov' function in R (version 3.6.1)<sup>46</sup> with RStudio (version 1.2.1335)<sup>47</sup>, including CS type as a factor  
441 with four levels. Partial eta squared were computed with the 'etasq' function of R package heplots<sup>48</sup>.  
442 Moreover, we computed pairwise one-sided paired t-tests for CS(100%) > CS(66%), CS(66%) > CS(33%), and  
443 CS(33%) > CS(0%) with Holm-Bonferroni multiple comparisons correction over the three comparisons.

444

#### 445 *Pupil size recording and analysis*

446 Due to technical limitations, no psychophysiological trial-by-trial learning indices were available in the MRI  
447 environment. To ensure learning in this paradigm, we conducted a separate experiment ( $N = 19$ , 164 trials  
448 with 24 trials of acquisition and 140 trials of maintenance) on an independent sample outside the MRI  
449 scanner. Gaze direction and pupil area were recorded with an EyeLink 1000 system (SR Research, Ottawa,

450 ON, Canada) from both eyes of each participant at 500 Hz. For each participant, we used the eye with fewer  
451 missing data for analysis. The size of the visual presentation was 32 cm x 23 cm (1280 x 1024 pixel  
452 resolution). The center of the screen was at approximately 70 cm distance from the participants' eyes and  
453 the eye-tracking camera was at approximately the same distance. Calibration of gaze direction was done on  
454 a 3-by-3-point grid in the EyeLink software. EyeLink data files were converted and imported into the  
455 Psychophysiological Modelling (PsPM) toolbox (version 4.0.1, [bachlab.github.io/PsPM/](http://bachlab.github.io/PsPM/)) in MATLAB2018a for  
456 further preprocessing and analysis. Blink and saccade periods were detected by the EyeLink online parsing  
457 algorithm and excluded from pupil data during import into PsPM. Data points for which gaze direction  
458 deviated more than 5° visual angle from the center of the screen were excluded<sup>49,50</sup>. Raw pupil size data was  
459 filtered with a unidirectional first order Butterworth low pass filter with 25 Hz cut off frequency and  
460 downsampled to 50 Hz. Missing data were linearly interpolated for further analysis. One participant was  
461 excluded from further pupil size analysis based on a criterion of having more than 75% trials with more than  
462 75% missing data points during 11 seconds following CS onset due to invalid fixations, saccades or blinks.

463 Pupil size has been suggested to relate to US prediction<sup>27</sup>, but it is unclear how this relation evolves  
464 during CS presentation. A previous psychophysiological model for analysis of threat-conditioned pupil size  
465 responses was optimized for discriminative (one CS+ vs. one CS-) threat conditioning<sup>50</sup>. This is why we here  
466 took a data-driven approach to analyze the relation between pupil size and US probability, using a cluster-  
467 level random permutation test<sup>51</sup>. This analysis was performed in R (version 3.5.2)<sup>46</sup> and RStudio (version  
468 1.0.136)<sup>47</sup>. First, we tested for a linear relation between CS type and pupil size by conducting a linear  
469 regression for every time point (in 0.1 s bins) during CS presentation until US onset, 6 s after CS onset. The  
470 resulting coefficient and *p*-values were compared against values derived from 1000 regressions with  
471 randomly shuffled trial labels in a permutation test, under the null hypothesis that trial labels are  
472 exchangeable. To account for multiple comparison across time, we applied cluster-level correction for  
473 family-wise error<sup>51,52</sup>. This test controls the false positive rate for the statement that there is any effect  
474 somewhere within the correction window, and thus makes no a priori assumption about the location of an  
475 effect. Importantly, for this test, the temporal cluster extents are only descriptive and not controlled for the  
476 error rate. Next, we conducted post-hoc t-tests with permutation to investigate differences between the  
477 four CS conditions over the interval between CS and US onset.

478

#### 479 *fMRI data acquisition and preprocessing*

480 Data were acquired using a 3 T Prisma MRI scanner (Siemens, Erlangen, Germany) with a 64-channel head  
481 coil. T<sub>2</sub>\*-weighted multi-echo echo-planar images (EPI) were acquired using a custom-made 2D EPI sequence  
482<sup>53</sup>. The in-plane resolution was 3 mm isotropic and the size of the acquisition matrix was 64 x 64 (FOV 192  
483 mm). 40 axial slices were acquired in ascending order, with a nominal thickness of 2.5 mm and inter-slice gap

484 of 0.5 mm (effective thickness 3 mm). The volume TR was 3.2 s and the flip angle 90°. Parallel imaging was  
485 used with an acceleration factor of 2 along the phase-encoding direction and images were reconstructed  
486 using GRAPPA<sup>54</sup>. In order to avoid signal dropouts in the EPI images and achieve maximal BOLD sensitivity in  
487 all brain areas, a multi-echo EPI acquisition was used<sup>55</sup> with the following echo times: TE = 17.4/35/53 ms .  
488 There were 6 fMRI runs in the experiment, with 24 trials in the first run, 44 trials in each of runs 2–5 and 24  
489 trials in run 6, summing up to a total of 224 trials. Phase and magnitude B0 field maps were acquired at the  
490 beginning of the experiment (TE 10 and 12.46 ms, TR 1020 ms, FOV 192 mm, 64 transversal slices of 2 mm  
491 thickness). A high-resolution structural scan was obtained at the end of the scan session (MP-RAGE; TR 2000  
492 ms, TE 2.39 ms, inversion time 920 ms, 1 x 1 x 1 mm voxel size, flip angle 9°, FOV 256 mm, 176 sagittal  
493 slices).

494 During fMRI, we collected respiratory and cardiac data to correct for physiological noise in the fMRI  
495 analysis, using the scanner's in-built breathing belt and a strapped photoplethysmograph on the left index  
496 finger. Data were recorded with a PPG100C MRI amplifier and a BIOPAC MP150 system.

497 We used SPM12b (Wellcome Trust Centre for Neuroimaging, London) and MATLAB2016a  
498 (Mathworks, Sherborn, MA, USA) to preprocess and analyze fMRI data. Preprocessing of the structural  
499 imaging data included field inhomogeneity correction and segmentation. Preprocessing of the functional  
500 images started with the combination, for each volume, of the EPI images acquired at different echo times  
501 using a simple summation. Because the first echo has very good sensitivity for high-dropout regions and the  
502 two others give better sensitivity for other regions, this process leads to maximal BOLD sensitivity to all brain  
503 areas<sup>55</sup>. This was followed by correction of image distortions using the SPM FieldMap toolbox<sup>56</sup> and the B0  
504 field map data, slice-time correction, motion correction (realignment), as well as co-registration with the T<sub>1</sub>-  
505 weighted structural images, spatial normalization to the Montreal Neurological Institute (MNI) template, and  
506 spatial smoothing with an 8 x 8 x 8 mm FWHM Gaussian filter. Serial autocorrelations were estimated using  
507 SPM 12's FAST model<sup>57</sup>. Cardiac and respiratory signals were used for physiological noise correction with the  
508 RETROICOR method<sup>58</sup> as implemented in the PhysIO toolbox for SPM<sup>59</sup>. In total, 18 physiological noise  
509 regressors (cardiac: 3 orders, respiratory: 4 orders, interaction: 1 order) and 6 head motion regressors from  
510 the realignment were used as nuisance parameters in the analyses. The third run of one participant was  
511 excluded from the fMRI analyses due to head motion in the beginning of the run leading to a severe artefact  
512 affecting all volumes within the run.

513 In all analyses, we performed standard random effects analyses at the group level. First-level  
514 contrast images from each participant were entered into one-sample *t*-tests against zero and statistical  
515 parametric maps were created with cluster-level family-wise error (FWE) correction at  $p < 0.05$  with initial  
516 cluster-forming threshold  $p < 0.001$ <sup>60</sup>. For illustration, functional results were overlaid on a normalized mean  
517 anatomical (grey and white matter only) image of our sample of participants. Anatomical location of clusters



518 was defined based on the Neuromorphometrics labels in SPM12 for the top three peak voxels within the  
519 cluster with highest  $T$ -values. Importantly, there is no anatomical specificity for activity within any of the  
520 clusters due to the cluster-level correction. The anatomical labels are included to give the reader an  
521 approximation of the location of the entire cluster.

522

### 523 *Mass univariate whole-brain analysis of PE signals*

524 The first level GLMs for each participant modelled cue (CS) and outcome (US) events as stick functions and  
525 included parametric modulators of these events as well as nuisance regressors. The CS-US interval of 6  
526 seconds was chosen to reduce design matrix collinearity: the correlation of them modelled hemodynamic  
527 responses to CS and US event was Pearson's  $r = -0.06$ . As parametric modulators, we included expectation  
528 of the US outcome for CS events, and PE (computed from this expectation) for US events. US expectation  
529 was formalized in the primary analysis as the overall US rate (0%, 33%, 66%, or 100%) for the CS presented  
530 on that trial (primary analysis) and in a supporting analysis as the prior expectation of the US+ probability  
531 from a normative Bayesian learning model, which in a previous study provided the best description of trial-  
532 by-trial conditioned skin conductance and pupil size responses across several samples<sup>27</sup>. Notably, US  
533 expectation from these two approaches is almost identical during the maintenance phase. The US outcome  
534 was defined as either 1 (US+) or 0 (US-). For primary and exploratory follow-up analysis, we constructed  
535 separate GLMs with the following different PE terms: (1) full signed PE (outcome–expectation for both US+  
536 and US- trials, primary analysis), (2) positive PE (outcome–expectation for US+ trials only), (3) negative PE  
537 (outcome–expectation for US- trials only), and (4) unsigned PE ( $|\text{outcome–expectation}|$  for all trials).  
538 Analysis (4) can also be interpreted as a test for slope differences between negative and positive PEs. These  
539 four different PEs were calculated with both definitions of expectation. For each contrast, we examined  
540 correlated BOLD activity with a one-tailed one-sample  $t$ -test against zero. Our a priori expectation was that  
541 higher positive PEs (positive values after US+) would relate to higher BOLD signal and higher negative PEs  
542 (negative values after US-) to lower BOLD signal, based on previous work on instrumental aversive  
543 conditioning and parametric threat learning<sup>20</sup>. Regarding analysis (4), we assumed that unsigned PEs would  
544 relate to higher BOLD signals, based on previous work<sup>14</sup>.

545 Next, we conducted follow-up analyses of the averaged signal from significant clusters and a-priori  
546 anatomical regions (see section on region-of-interest analysis), as well as a follow-up whole-brain analysis, to  
547 determine whether BOLD signal in any detected cluster, or in any voxel, would fulfill the necessary and  
548 sufficient conditions for representing PEs (Fig. 1C)<sup>23</sup>. To this end, we computed an additional GLM agnostic  
549 to the parametric values of PE (“categorical GLM”), where we modelled the 4 different CS, and the 6  
550 different US types (one for each possible CS-US pairing), in separate conditions. For the voxel-wise whole-  
551 brain analysis, we conducted a conjunction null test (logical “AND”) on the significance of all relevant



552 condition contrasts in both directions for the outcome and expectancy conditions (Fig. 1C, axiom 1 and 2).  
553 We defined conjunctions separately for the full PE model (all 6 possible contrasts), positive PE (US+ trials  
554 only), negative PE (US- trials only), and unsigned PE (no differentiation between US+ and US- trials, only  
555 unexpectedness counts). We did not explicitly test for the condition that fully expected outcomes should  
556 elicit similar BOLD activity (Fig. 1C, axiom 3). This requires a test of equivalence, which was not necessary  
557 since the results for the other axioms were already negative.

#### 558 559 *Mass univariate region-of-interest analysis for PEs*

560 We next analyzed whether BOLD signal in the significant cluster from our primary analysis, and in different  
561 anatomical regions-of-interest (ROI), fulfilled necessary and sufficient criteria to represent PEs. Anatomical  
562 masks for thalamus, anterior and posterior insula, and anterior cingulate cortex were created from the WFU  
563 PickAtlas AAL library<sup>61,62</sup>. Frontal cortex ROI masks were created separately for Brodmann Areas 8–11 and  
564 44–47 (dilation level 1 in 2D). For amygdala, we binarized probabilistic masks from Abivardi and Bach (2017)  
565 (combined basolateral and centrocortical divisions) which are based on manual segmentation of N = 50  
566 datasets from the Human Connectome Project<sup>64</sup>. The binarization threshold was set at 0.5 to obtain mask  
567 volumes (mm<sup>3</sup>, in final normalized functional space) within 1 SD of the mean native space volumes reported  
568 in Abivardi and Bach (2017). For periaqueductal grey (PAG), we used the high-resolution probabilistic  
569 anatomical mask for young people (linear option) from the ATAG atlas<sup>65</sup>. The probabilistic PAG mask was  
570 binarized at a threshold of 0.13, which best retained the anatomical shape of the PAG when inspected  
571 qualitatively with respect to a normalized mean image of the participants' anatomical scans. We used high-  
572 resolution anatomical masks from the recent Reinforcement Learning Atlas<sup>66</sup> for ventral striatum (nucleus  
573 accumbens), dorsal striatum (caudate nucleus and putamen), and dopaminergic midbrain (substantia nigra  
574 pars reticulata/compacta and ventral tegmental area). The anatomical ROIs were defined in the MNI space,  
575 co-registered to the functional space, and used in the analyses at the group level. Moreover, to explore the  
576 results from the GLMs, we extracted parameter estimates from clusters with significant activity associated  
577 with each different type of PE (cluster-level corrected FWE  $p < 0.05$  with  $p < 0.001$  initial threshold, see Table  
578 3 for the clusters and their statistics).

579 For each anatomical ROI and significant functional cluster, we extracted the average BOLD amplitude  
580 estimates from the categorical GLM for the six US outcome conditions in the maintenance trials. For the a  
581 priori anatomical ROIs, we investigated whether the average BOLD signals fulfilled the axioms by computing  
582 paired Cohen's  $d$  effect sizes ('cohensD' function of lsr package in R)<sup>67</sup> for the following comparisons: Axiom  
583 1): US+ > US- for US expectation conditions CS(33%) and CS(66%), (2) Axiom 2): different levels of US+  
584 expectation: CS(0%) > CS(33%) and CS(33%) > CS(66%) for US-, and CS(33%) > CS(66%) and CS(66%) >  
585 CS(100%) for US+ trials, and Axiom 3) CS(100%) > CS(33%) (see Fig. 1C; 7 effect size computations in total).  
586 Moreover, we created linear mixed effects models ('lme' function in the nlme package in R)<sup>68</sup> on the BOLD

587 amplitude estimates for (1) full signed PEs, (2) positive PEs, (3) negative PEs, (4) unsigned PEs, (5) US+/US-  
588 outcome, and (6) null model. Each model included PE or outcome values as the fixed effect. To account for  
589 potential asymmetry between positive and negative PEs, we also included a full PE model with separate  
590 fixed effects for positive and negative PEs, allowing different intercepts and slopes. The null model only  
591 contained a constant value 1 as the intercept. Each model included a participant intercept as a random  
592 factor, allowing for a different intercept but not slope for each participant (1 | Participants). All models were  
593 estimated using the maximum likelihood (ML) method to allow extraction of model evidence metrics. To  
594 formally compare the different models, we computed Bayes factors with Bayesian Information Criterion  
595 approximation for frequentist linear regression models with R package bayestestR<sup>69,70</sup>. For the functional  
596 clusters, we conducted post-hoc effect size computations for the axioms with Cohen's *d* for paired  
597 observations similarly to the tests for the anatomical ROIs (Fig. 1C).

598

### 599 *Whole-brain analysis for the normative Bayesian model*

600 A previous modelling study revealed that the trial-by-trial trajectory of skin conductance and pupil size  
601 responses in a discriminative threat conditioning paradigm was best explained by a beta-binomial normative  
602 Bayesian learning model<sup>27</sup>. Thus, we explored whether quantities from that model relate to BOLD activity. In  
603 our GLM, CS responses were parametrically modulated by (1) expectation of shock outcome based on prior  
604 belief, (2) uncertainty of the prior belief about the outcome, (3) entropy of the prior, (4) model update from  
605 the previous trial of the same CS type, and (5) surprise about the outcome of the previous trial of the same  
606 CS type; and US activity was modulated by (1) outcome (US+ or US-), (2) model update on the current trial,  
607 and (3) surprise about the outcome of the current trial. All parametric modulators were serially  
608 orthogonalized. We looked at these model quantities separately for the combined acquisition phases, and  
609 the maintenance phase, as well as over the whole experiment. For each model quantity, we examined its  
610 relation of BOLD activity with two one-tailed one-sample *t*-tests against zero. For definition of the quantities  
611 above, please see Supplementary Information.

612

### 613 **Data availability**

614 Group-level unthresholded SPMs, ROI masks and mean beta values relevant to the results are available at  
615 [doi.org/10.5281/zenodo.3939294](https://doi.org/10.5281/zenodo.3939294). Pupil data are available upon acceptance. Remaining data are available  
616 from the authors upon reasonable request.

617

### 618 **Code availability**

619 The code for the experiment, analysis and figures are available at [gitlab.com/kojala/threatlearning\\_fmri](https://gitlab.com/kojala/threatlearning_fmri).

## 620 References

- 621 1. Seymour, B. Pain: A Precision Signal for Reinforcement Learning and Control. *Neuron* **101**, 1029–1041 (2019).  
622 2. Rescorla, R. A. & Wagner, A. R. A Theory of Pavlovian Conditioning: Variations in the Effectiveness of  
623 Reinforcement and Nonreinforcement. in *Classical conditioning II: current research and theory* (eds. Prokasy, A.  
624 & Black, W. F.) 64–99 (Appleton-Century-Crofts, 1972). doi:10.1101/gr.110528.110.  
625 3. Schultz, W. & Dickinson, A. Neuronal Coding of Prediction Errors. *Annu. Rev. Neurosci.* **23**, 473–500 (2000).  
626 4. Steinberg, E. E. *et al.* A causal link between prediction errors, dopamine neurons and learning. *Nat. Neurosci.*  
627 **16**, 966–973 (2013).  
628 5. Chang, C. Y., Gardner, M., Di Tillio, M. G. & Schoenbaum, G. Optogenetic Blockade of Dopamine Transients  
629 Prevents Learning Induced by Changes in Reward Features. *Curr. Biol.* **27**, 3480–3486.e3 (2017).  
630 6. Johansen, J. P., Tarpley, J. W., LeDoux, J. E. & Blair, H. T. Neural substrates for expectation-modulated fear  
631 learning in the amygdala and periaqueductal gray. *Nat. Neurosci.* **13**, 979–86 (2010).  
632 7. Groessl, F. *et al.* Dorsal tegmental dopamine neurons gate associative learning of fear. *Nat. Neurosci.* **21**, 952–  
633 962 (2018).  
634 8. Ozawa, T. *et al.* A feedback neural circuit for calibrating aversive memory strength. *Nat. Neurosci.* **20**, 90–97  
635 (2017).  
636 9. Luo, R. *et al.* A dopaminergic switch for fear to safety transitions. *Nat. Commun.* **9**, 1–11 (2018).  
637 10. Salinas-Hernández, X. I. *et al.* Dopamine neurons drive fear extinction learning by signaling the omission of  
638 expected aversive outcomes. *Elife* **7**, 1–25 (2018).  
639 11. Lak, A., Stauffer, W. R. & Schultz, W. Dopamine neurons learn relative chosen value from probabilistic rewards.  
640 *Elife* **5**, 1–19 (2016).  
641 12. Herry, C. & Johansen, J. P. Encoding of fear learning and memory in distributed neuronal circuits. *Nat. Neurosci.*  
642 **17**, 1644–1654 (2014).  
643 13. Seymour, B. *et al.* Temporal difference models describe higher order learning in humans. *Nature* **429**, 664–667  
644 (2004).  
645 14. Li, J., Schiller, D., Schoenbaum, G., Phelps, E. A. & Daw, N. D. Differential roles of human striatum and amygdala  
646 in associative learning. *Nat. Neurosci.* **14**, 1250–1252 (2011).  
647 15. Boll, S., Gamer, M., Gluth, S., Finsterbusch, J. & Büchel, C. Separate amygdala subregions signal surprise and  
648 predictiveness during associative fear learning in humans. *Eur. J. Neurosci.* **37**, 758–767 (2013).  
649 16. Zhang, S., Mano, H., Ganesh, G., Robbins, T. & Seymour, B. Dissociable Learning Processes Underlie Human Pain  
650 Conditioning. *Curr. Biol.* **26**, 52–58 (2016).  
651 17. Seymour, B. *et al.* Opponent appetitive-aversive neural processes underlie predictive learning of pain relief.  
652 *Nat. Neurosci.* **8**, 1234–1240 (2005).  
653 18. Dunsmoor, J. E., Bandettini, P. A. & Knight, D. C. Neural correlates of unconditioned response diminution during  
654 Pavlovian conditioning. *Neuroimage* **40**, 811–817 (2008).  
655 19. Spoomaker, V. I. *et al.* The neural correlates of negative prediction error signaling in human fear conditioning.  
656 *Neuroimage* **54**, 2250–2256 (2011).  
657 20. Roy, M. *et al.* Representation of aversive prediction errors in the human periaqueductal gray. *Nat. Neurosci.* **17**,  
658 1607–12 (2014).  
659 21. Pauli, W. M. *et al.* Distinct Contributions of Ventromedial and Dorsolateral Subregions of the Human Substantia  
660 Nigra to Appetitive and Aversive Learning. *J. Neurosci.* **35**, 14220–14233 (2015).  
661 22. McHugh, S. B. *et al.* Aversive prediction error signals in the amygdala. *J. Neurosci.* **34**, 9024–33 (2014).  
662 23. Caplin, A. & Dean, M. Axiomatic methods, dopamine and reward prediction error. *Curr. Opin. Neurobiol.* **18**,  
663 197–202 (2008).  
664 24. Rutledge, R. B., Dean, M., Caplin, A. & Glimcher, P. W. Testing the Reward Prediction Error Hypothesis with an  
665 Axiomatic Model. *J. Neurosci.* **30**, 13525–13536 (2010).  
666 25. Hart, A. S., Rutledge, R. B., Glimcher, P. W. & Phillips, P. E. M. Phasic dopamine release in the rat nucleus  
667 accumbens symmetrically encodes a reward prediction error term. *J. Neurosci.* **34**, 698–704 (2014).  
668 26. de Berker, A. O. *et al.* Computations of uncertainty mediate acute stress responses in humans. *Nat. Commun.* **7**,  
669 10996 (2016).  
670 27. Tzovara, A., Korn, C. W. & Bach, D. R. Human Pavlovian fear conditioning conforms to probabilistic learning.  
671 *PLoS Comput. Biol.* **14**, e1006243 (2018).  
672 28. Yau, J. O. Y. & McNally, G. P. Brain Mechanisms Controlling Pavlovian Fear Conditioning. *J. Exp. Psychol. Anim.*  
673 *Learn. Cogn.* **44**, 341–357 (2018).  
674 29. Dabney, W. *et al.* A distributional code for value in dopamine-based reinforcement learning. *Nature* **577**, 671–  
675 675 (2020).

- 676 30. Pearce, J. M. & Hall, G. A model for stimulus generalization in Pavlovian conditioning: variation in the  
677 effectiveness of conditioned but not unconditioned stimuli. *Psychol. Rev.* **87**, 532–552 (1980).
- 678 31. Shih, Y. W. *et al.* Effects of positive and negative expectations on human pain perception engage separate but  
679 interrelated and dependently regulated cerebral mechanisms. *J. Neurosci.* **39**, 1261–1274 (2019).
- 680 32. Maia, T. V. Two-factor theory, the actor-critic model, and conditioned avoidance. *Learn. Behav.* **38**, 50–67  
681 (2010).
- 682 33. Schultz, W. Dopamine reward prediction error coding. *Nat. Rev. Neurosci.* **17**, 183–195 (2016).
- 683 34. Walker, R. A., Wright, K. M., Zhou, T. C. & McDannald, M. A. The ventrolateral periaqueductal grey updates fear  
684 via positive prediction error. *Eur. J. Neurosci.* **51**, 866–880 (2020).
- 685 35. Marek, R., Strobel, C., Bredy, T. W. & Sah, P. The amygdala and medial prefrontal cortex: Partners in the fear  
686 circuit. *J. Physiol.* **591**, 2381–2391 (2013).
- 687 36. Likhtik, E., Stujenske, J. M., Topiwala, M. A., Harris, A. Z. & Gordon, J. A. Prefrontal entrainment of amygdala  
688 activity signals safety in learned fear and innate anxiety. *Nat. Neurosci.* **17**, 106–113 (2014).
- 689 37. Fullana, M. A. *et al.* Neural signatures of human fear conditioning: an updated and extended meta-analysis of  
690 fMRI studies. *Mol. Psychiatry* **2188**, 500–508 (2016).
- 691 38. Harrison, B. J. *et al.* Human ventromedial prefrontal cortex and the positive affective processing of safety  
692 signals. *Neuroimage* **152**, 12–18 (2017).
- 693 39. Reijmers, L. G., Perkins, B. L., Matsuo, N. & Mayford, M. Localization of a stable neural correlate of associative  
694 memory. *Science (80-. )*. **317**, 1230–1233 (2007).
- 695 40. Kahnt, T., Park, S. Q., Haynes, J.-D. & Tobler, P. N. Disentangling neural representations of value and salience in  
696 the human brain. *Proc. Natl. Acad. Sci. U. S. A.* **111**, 5000–5 (2014).
- 697 41. Ciocchi, S. *et al.* Encoding of conditioned fear in central amygdala inhibitory circuits. *Nature* **468**, 277–282  
698 (2010).
- 699 42. Haubensak, W. *et al.* Genetic dissection of an amygdala microcircuit that gates conditioned fear. *Nature* **468**,  
700 270–276 (2010).
- 701 43. Bach, D. R., Weiskopf, N. & Dolan, R. J. A Stable Sparse Fear Memory Trace in Human Amygdala. *J. Neurosci.* **31**,  
702 9383–9389 (2011).
- 703 44. Staib, M. & Bach, D. R. Stimulus-invariant auditory cortex threat encoding during fear conditioning with simple  
704 and complex sounds. *Neuroimage* **166**, 276–284 (2018).
- 705 45. Staib, M., Abivardi, A. & Bach, D. R. Primary auditory cortex representation of fear-conditioned musical sounds.  
706 *Hum. Brain Mapp.* 1–10 (2019) doi:10.1002/hbm.24846.
- 707 46. RCoreTeam. R: A language and environment for statistical computing. (2019).
- 708 47. RStudioTeam. RStudio: Integrated Development for R. (2018).
- 709 48. Fox, J., Friendly, M. & Monette, G. heplots: Visualizing Tests in Multivariate Linear Models. (2018).
- 710 49. Korn, C. W. & Bach, D. R. A solid frame for the window on cognition: Modeling event-related pupil responses. *J.*  
711 *Vis.* **16**, 28 (2016).
- 712 50. Korn, C. W., Staib, M., Tzovara, A., Castegnetti, G. & Bach, D. R. A pupil size response model to assess fear  
713 learning. *Psychophysiology* **54**, 330–343 (2017).
- 714 51. Maris, E. & Oostenveld, R. Nonparametric statistical testing of EEG- and MEG-data. *J. Neurosci. Methods* **164**,  
715 177–190 (2007).
- 716 52. Sassenhagen, J. & Draschkow, D. Cluster-based permutation tests of MEG/EEG data do not establish  
717 significance of effect latency or location. *Psychophysiology* **56**, 1–8 (2019).
- 718 53. Lutti, A., Thomas, D. L., Hutton, C. & Weiskopf, N. High-resolution functional MRI at 3 T: 3D/2D echo-planar  
719 imaging with optimized physiological noise correction. *Magn. Reson. Med.* **69**, 1657–1664 (2013).
- 720 54. Griswold, M. A. *et al.* Generalized Autocalibrating Partially Parallel Acquisitions (GRAPPA). *Magn. Reson. Med.*  
721 **47**, 1202–1210 (2002).
- 722 55. Poser, B. A., Versluis, M. J., Hoogduin, J. M. & Norris, D. G. BOLD contrast sensitivity enhancement and artifact  
723 reduction with multiecho EPI: Parallel-acquired inhomogeneity-desensitized fMRI. *Magn. Reson. Med.* **55**,  
724 1227–1235 (2006).
- 725 56. Hutton, C. *et al.* Image distortion correction in fMRI: A quantitative evaluation. *Neuroimage* **16**, 217–240 (2002).
- 726 57. Corbin, N., Todd, N., Friston, K. J. & Callaghan, M. F. Accurate modeling of temporal correlations in rapidly  
727 sampled fMRI time series. *Hum. Brain Mapp.* **39**, 3884–3897 (2018).
- 728 58. Glover, G. H., Li, T. Q. & Ress, D. Image-based method for retrospective correction of physiological motion  
729 effects in fMRI: RETROICOR. *Magn. Reson. Med.* **44**, 162–167 (2000).
- 730 59. Kasper, L. *et al.* The PhysIO Toolbox for Modeling Physiological Noise in fMRI Data. *J. Neurosci. Methods* **276**,  
731 56–72 (2017).
- 732 60. Eklund, A., Nichols, T. E. & Knutsson, H. Cluster failure: Why fMRI inferences for spatial extent have inflated

- 733 false-positive rates. *Proc. Natl. Acad. Sci.* **113**, 7900–7905 (2016).
- 734 61. Tzourio-Mazoyer, N. *et al.* Automated anatomical labeling of activations in SPM using a macroscopic anatomical  
735 parcellation of the MNI MRI single-subject brain. *Neuroimage* **15**, 273–289 (2002).
- 736 62. Maldjian, J. A., Laurienti, P. J., Kraft, R. A. & Burdette, J. H. An automated method for neuroanatomic and  
737 cytoarchitectonic atlas-based interrogation of fMRI data sets. *Neuroimage* **19**, 1233–1239 (2003).
- 738 63. Abivardi, A. & Bach, D. R. Deconstructing white matter connectivity of human amygdala nuclei with thalamus  
739 and cortex subdivisions in vivo. *Hum. Brain Mapp.* **38**, 3927–3940 (2017).
- 740 64. Van Essen, D. C. *et al.* The Human Connectome Project: A data acquisition perspective. *Neuroimage* **62**, 2222–  
741 2231 (2012).
- 742 65. Keuken, M. C. *et al.* Effects of aging on T1 , T2\* , and QSM MRI values in the subcortex. *Brain Struct. Funct.* **222**,  
743 2487–2505 (2017).
- 744 66. Pauli, W. M., Nili, A. N. & Michael Tyszka, J. Data Descriptor: A high-resolution probabilistic in vivo atlas of  
745 human subcortical brain nuclei. *Sci. Data* **5**, 1–13 (2018).
- 746 67. Navarro, D. J. Learning statistics with R: A tutorial for psychology students and other beginners. (2015).
- 747 68. Pinheiro, J., Bates, D., DebRoy, S., Sarkar, D. & RCoreTeam. nlme: Linear and Nonlinear Mixed Effects Models.  
748 (2020).
- 749 69. Makowski, D., Ben-Shachar, M. & Lüdtke, D. bayestestR: Describing Effects and their Uncertainty, Existence  
750 and Significance within the Bayesian Framework. *J. Open Source Softw.* **4**, 1541 (2019).
- 751 70. Wagenmakers, E. J. A practical solution to the pervasive problems of p values. *Psychon. Bull. Rev.* **14**, 779–804  
752 (2007).
